# Supplementary material
Source: PubMed Central journal article supplement (PMC7562921)
Supplement: mmc1.pdf [file mmc1.pdf]

## Supplementary Document

**Cite As:** Labib, S. M., Huck, J. J., & Lindley, S. (2021). Modelling and mapping eye-level greenness visibility exposure using multi-source data at high spatial resolutions. *Science of The Total Environment*, 143050. DOI: <https://doi.org/10.1016/j.scitotenv.2020.143050>

### Contents

Supplementary Figures (p 1-3)

Supplementary Tables (p 4)

### Supplementary Figures

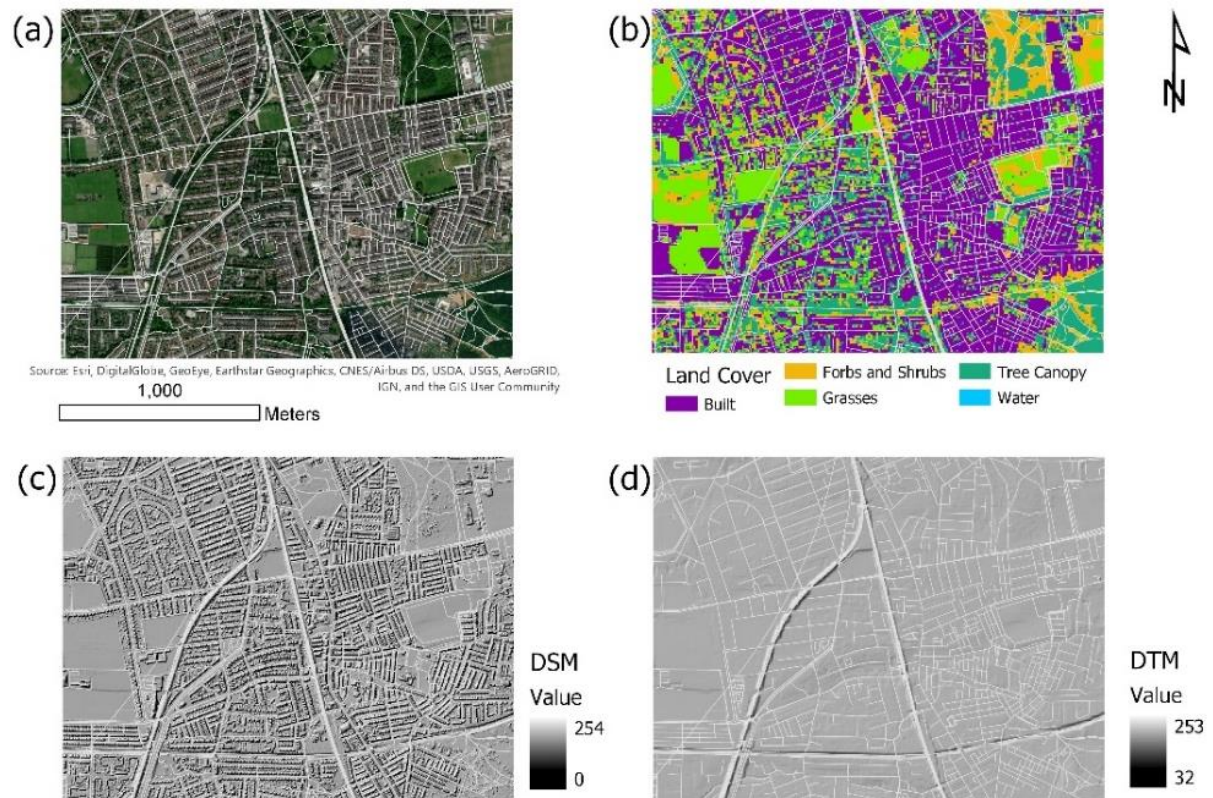

**Figure S1:** Examples of (a) High-resolution satellite image within the study area (Source: ESRI, 2020); (b) Land cover data (Source: Dennis et al., 2018); (c) Digital surface model; (d) Digital terrain model. Overlaid with OpenStreetMap road network dataset.

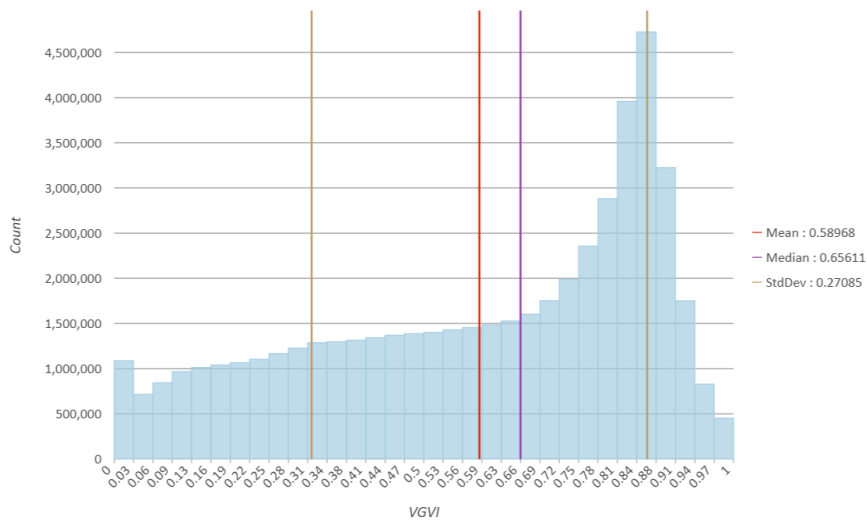

**Figure S2:** Viewshed greenness visibility index value distribution for Greater Manchester.

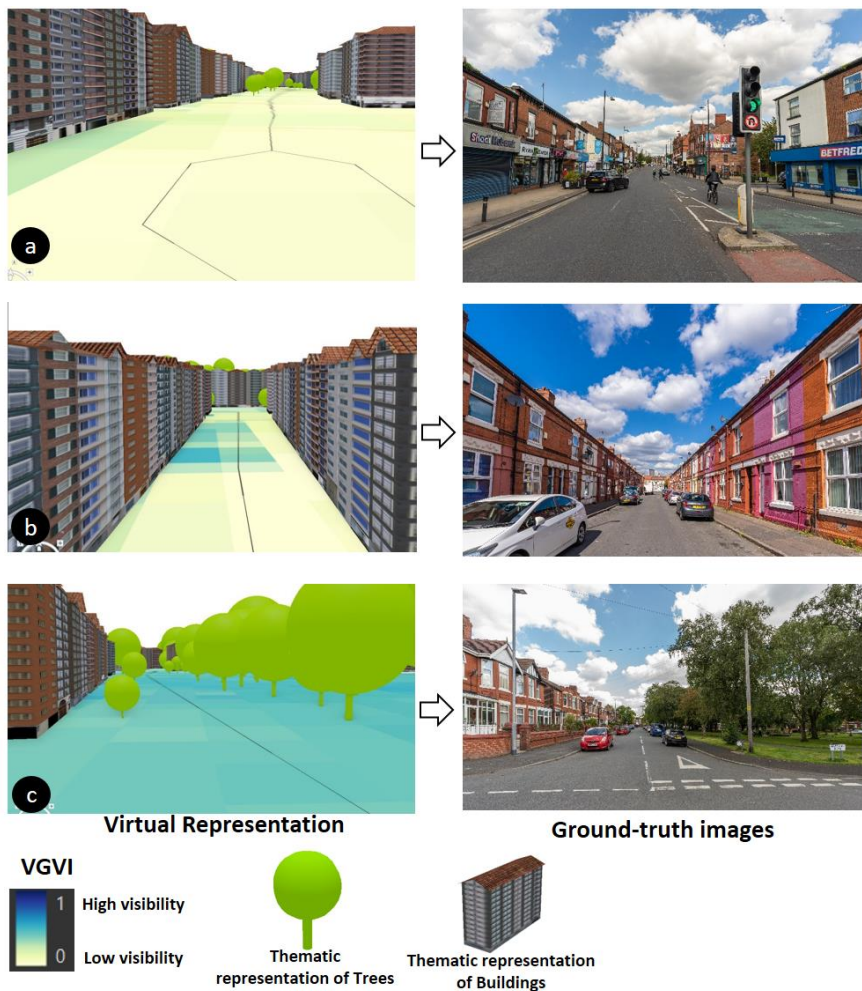

**Figure S3:** Ground truth validation of VGVI modelled values, comparing in virtual environment. High VGVI values correspond to greater greenness, and low VGVI values indicates low greenness in ground truth photos. Ground-truth photos taken by the lead author.

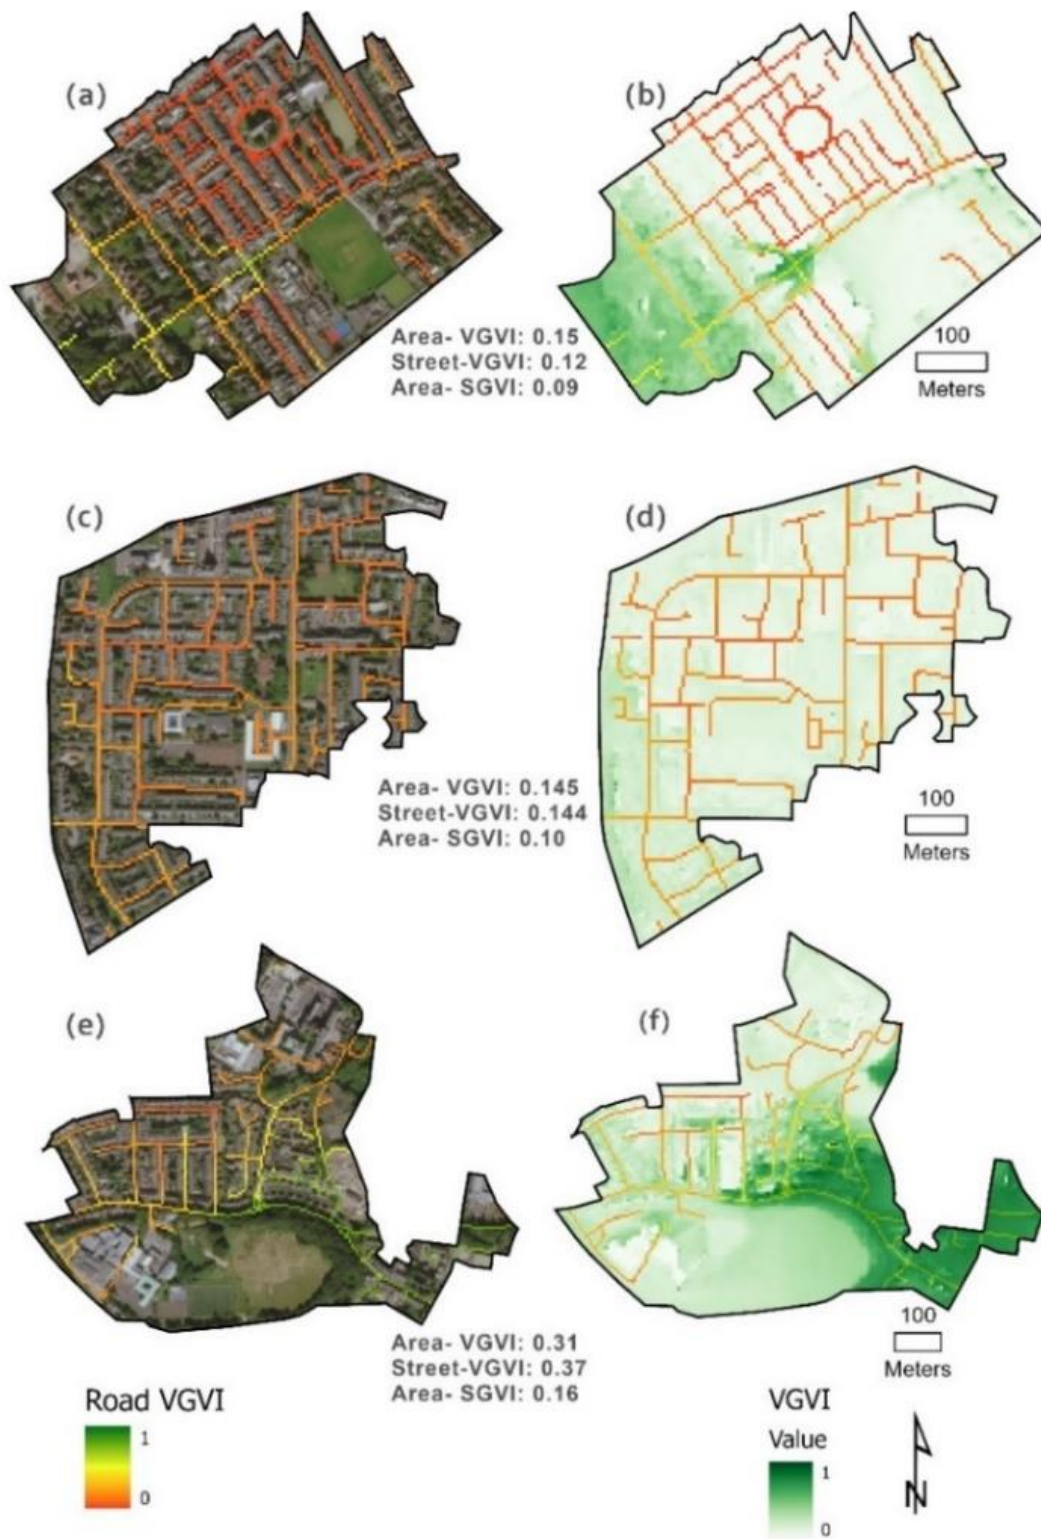

**Figure S4:** Examples of studied neighbourhoods with different morphological patterns and varying greenness visibility values.

## Supplementary Tables

**Table S1:** Pearson's correlation coefficients between mean neighbourhood scale greenness visibility for street-only locations, and entire neighbourhoods.

|                                        |                     | Mean VGVI at Neighbourhood | Mean street-only VGVI at Neighbourhood | Mean SGVI at Neighbourhood |
|----------------------------------------|---------------------|----------------------------|----------------------------------------|----------------------------|
| Mean VGVI at Neighbourhood             | Pearson Correlation | 1                          | <b>0.937**</b>                         | 0.434                      |
|                                        | Sig. (2-tailed)     |                            | 0.000                                  | 0.106                      |
|                                        | N                   |                            | 15                                     | 15                         |
| Mean street-only VGVI at Neighbourhood | Pearson Correlation |                            | 1                                      | <b>0.572*</b>              |
|                                        | Sig. (2-tailed)     |                            |                                        | 0.026                      |
|                                        | N                   |                            |                                        | 15                         |
| Mean SGVI at Neighbourhood             | Pearson Correlation |                            |                                        | 1                          |

\*\*correlations are significant at the 0.01 level. \*correlations are significant at the 0.05 level; (2-tailed).

**Table S2:** Difference between neighbourhood street-only and total greenness visibility.

|                                                           | Paired Differences |                |                 |                                           |        | t     | df | Sig. (2-tailed) |
|-----------------------------------------------------------|--------------------|----------------|-----------------|-------------------------------------------|--------|-------|----|-----------------|
|                                                           | Mean               | Std. Deviation | Std. Error Mean | 95% Confidence Interval of the Difference |        |       |    |                 |
|                                                           |                    |                |                 | Lower                                     | Upper  |       |    |                 |
| <b>Mean VGVI at Neighbourhood - Mean street-only VGVI</b> | .036               | .061           | .01589          | .00191                                    | .07009 | 2.265 | 14 | .040            |

**Table S3:** Correlations between neighbourhood dwelling numbers and neighbourhood average greenness visibility measurements.

|                            |                     | Mean VGVI at Neighbourhood | Mean street-only VGVI |
|----------------------------|---------------------|----------------------------|-----------------------|
| <b>Number of Dwellings</b> | Pearson Correlation | -.653**                    | -.589*                |
|                            | Sig. (2-tailed)     | .008                       | .021                  |
|                            | N                   | 15                         | 15                    |

\*\* . Correlation is significant at the 0.01 level (2-tailed). \* . Correlation is significant at the 0.05 level (2-tailed).
